# Supplementary material
Source: publisher figshare collection journal article supplement (https://sage.figshare.com/ndownloader/files/23797917)
Supplement: Supplementary file 1 [file 23797917]

**Development of Evidence-based Chinese Medicine Clinical Service Recommendations for** **Cancer Palliative Care using Delphi approach based on the** **Evidence to Decision Framework**

Abstract

Objectives

Existing evidence supports the use of certain Chinese medicine (CM) interventions for symptom management among palliative cancer patients. However, evidence-based service recommendations tailored to the local context are needed for CM planning and implementation. In response, we aimed to establish consensus on CM clinical service recommendations for cancer palliative care among Hong Kong experts.

Methods

Seven CM interventions showing statistically significant favourable results in existing systematic reviews (SRs) and overviews of SRs were subjected to a GRADE-ADOLOPMENT based two-round Delphi survey. Twelve Hong Kong experts in cancer palliative care, including conventionally trained physicians, Chinese medicine practitioners (CMPs) and nurses (n=4 from each category) were invited to participate. Use of the Evidence to Decision (EtD) framework within the GRADE-ADOLOPMENT approach enabled experts to consider aspects of problem priority, benefits, harms, equity, acceptability and feasibility when making CM recommendations in cancer palliative care.

Results

Three evidence-based CM interventions reached positive consensus as service recommendations, namely: i) acupuncture for reducing fatigue among palliative cancer patients; ii) acupressure for reducing fatigue among palliative cancer patients; and iii) moxibustion for reducing nausea and vomiting among patients receiving chemotherapy. Median rating of recommendation ranged from 2.5 to 3.0 (interquartile range (IQR): 0.00 to 1.00) on a 4-point Likert scale and the percentage agreement ranged from 83.4% to 91.7%.

Conclusions

The GRADE-ADOLOPMENT approach facilitates a consensus-based process of reaching three evidence-based CM recommendations for cancer palliative care. Future studies may develop tailored strategies to implement these recommendations in the Hong Kong health system.

**Introduction**

Echoing recommendations from the World Health Organization (WHO) on integrating traditional and complementary medicine (T&CM) into national health systems in an evidence-based manner,1 there is a need to develop evidence-based clinical service recommendations for T&CM services. Existing systematic reviews (SRs) and overviews of SRs identify certain Chinese medicine (CM) interventions, inclusive of Chinese herbal medicine (CHM) and acupuncture and related therapies, as effective in managing cancer-related symptoms, such as fatigue, nausea and vomiting, among palliative cancer patients.2-6 The palliative care version of the US National Comprehensive Cancer Network (NCCN) clinical practice guidelines in oncology7,8 has already recommended acupuncture for reducing cancer pain and cancer-related fatigue.

Since multiple stakeholders may have different perspectives and concerns regarding the implementation of these evidence-based CM service recommendations, it is important to bridge the gap between clinical evidence, healthcare experts’ experience, as well as patients’ values in decision making.9,10 The GRADE-ADOLOPMENT approach is a methodology which combines the advantages of adoption, adaptation and *de novo* development of recommendations among an expert panel based on Grading of Recommendations Assessment, Development and Evaluation (GRADE), as well as the associated Evidence to Decision (EtD) framework.11

As a core component of the approach, the EtD framework is applied for the following purposes:

1. providing experts with a concise summary of the best available evidence about each criterion, namely problem priority, benefits, harms, equity, acceptability and feasibility;
2. allowing experts to consider these criteria in a comprehensive manner on whether an intervention should be recommended;
3. structuring and documenting experts’ justifications on how each criterion described above would influence the direction, strength and implementability of the recommendations.11-13

The GRADE-ADOLOPMENT approach successfully guided the development of recommendations and guidelines in Canada14 and Australia;15 and Saudi Arabia.16 This approach has high adaptability for facilitating the formulation of health service recommendations in different health systems with distinct governance, financing and service delivery models.

Cancer is a major cause of disease burden in Hong Kong. According to the Hong Kong Hospital Authority (HA), there were 31,468 new cancer cases and 14,209 cancer deaths in 201617. Among local cancer patients, 68.9% received palliative care in publicly funded healthcare setting in 2015.18 A 2009 survey reported that over 50% of Hong Kong cancer patients receiving conventional treatments also concurrently utilized CM services with the expectation of reducing side effects of conventional treatments, limiting tumour progression and improving their quality of life.19 Nearly 90% of these patients also supported the government to integrate CM and biomedicine (BM) in cancer treatment within the Hong Kong health system.19

Under the influence of colonial history, CM is commonly used as a complement to BM, with the later occupying a dominant position in the health system.20 According to previous Hong Kong surveys, physicians and nurses held mixed attitudes towards the value of CM.21-22 Interprofessional collaboration is inevitable if CM services are to be integrated into the Hong Kong health system.23 Therefore, acceptance and endorsement from physicians and nurses are considered essential in the successful implementation of CM service recommendations in Hong Kong.24 In line with international experiences,25 physicians and nurses should be regarded as key stakeholders in the formulation of CM service recommendations.

Numerous factors are hindering the transition from parallel to integrative practice model.26 A previous systematic review (SR) showed that an unverified perception on the lack of high quality evidence supporting effectiveness and safety of CM was a common rhetorical tool employed amongst physicians to oppose collaboration with Chinese medicine practitioners (CMPs).25 One of the suggested solutions to change physicians’ opposition towards collaboration with CMPs was to implement existing CM modalities supported with sufficient evidence, and to design interprofessional collaboration plans accordingly.25

To translate evidence-based CM modalties into integrative practice, the current study aimed to establish consensus on evidence-based CM clinical service recommendations for cancer palliative care among Hong Kong experts using the EtD framework approach.

**Methods**

This Delphi survey is reported in accordance to the standard for Conducting and Reporting of Delphi Studies (CREDES).27 Ethical approval was obtained from the Survey and Behavioural Research Ethics Committee, The Chinese University of Hong Kong (reference no.: 023-17). The workflow of the study is presented in Figure 1 and details are described below:

***Part 1: Preparation of evidence profiles and EtD frameworks of CM interventions for cancer palliative care***

Three overviews of SRs and two SRs2-6 on CM interventions for cancer palliative care published in late 2015 and early 2016 were selected for this part. They were selected as they had critically appraised and summarized the most up-to-date clinical evidence on CHM as well as acupuncture and related therapies, for cancer palliative care at the time of our study. In these rigorous syntheses,2-6 methodological quality of 74 included SRs was evaluated using the AMSTAR instrument28 while risk of bias of 88 included randomized controlled trials (RCTs) were assessed with the Cochrane risk of bias tool.29 Strengths and limitations on the synthesized evidence were also highlighted by the original authors.2-6

By identifying statistically significant favourable results from these synthesis,2-6 our study focused on a total of seven CM interventions. Results of these interventions were displayed in seven evidence profiles, which presented in a consistent format: number of studies; number of participants; effects of binary and continuous outcomes including their corresponding 95% confidence intervals (CIs) and p-values; and quality of evidence.30,31 Quality of evidence was assessed by the Clinical and Health Intervention Meta-analysis Evidence RAting System (CHIMERAS) (Appendix 1, Supplementary material).32 The rating was conducted by the investigators and the Delphi experts were not required to rate evidence quality. Evidence profiles of the seven CM interventions are shown in Appendix 2 (Supplementary material).

EtD frameworks of the seven evidence-based CM interventions were then prepared. These frameworks facilitated Delphi experts’ decision-making process, moving from results presented in evidence profiles to recommendations, through explicit consideration of the following criteria: deemed priority of the problem, benefits, harms, equity, acceptability and feasibility of CM interventions.33 In this structured approach, experts were invited to consider the criteria mentioned above thoroughly,10,12 and subsequently each expert was invited to provide a rating on whether a specific CM intervention should be recommended in the Hong Kong health system. Rating of recommendations was assessed on a 4-point Likert scale, ranging from "recommend against this option" (i.e. strongly disagree with the proposed CM intervention), "suggest not this option" (i.e. disagree with the proposed CM intervention), "suggest this option" (i.e. agree with the proposed CM intervention), to "recommend this option" (i.e. strongly agree with the proposed CM intervention).11,34 Experts were also invited to provide additional qualitative comments on implementation, monitoring, evaluation and future research possibilities.7,31 EtD frameworks of the seven CM interventions are shown in Appendix 3 (Supplementary material).

***Part 2: Sampling of experts***

Purposive sampling is a technique widely used to identify individuals who are especially knowledgeable about, or experienced with, a phenomenon of interest.35 In the purposive sampling of this study, we selected a balanced number of conventionally trained physicians, CMPs and nurses (four experts from each of the three professions) with at least one year of professional experience in cancer palliative care service provision within the Hong Kong health system. Under such maximum variation sampling strategy, experts from different healthcare disciplines in cancer palliative care were identified to provide unique and diverse insight on CM service recommendations, ensuring balanced perspectives across members in the expert panel.35Since a smaller sample size would enable higher response rate, total number of experts recruited was limited to twelve.36 All participating experts were de-identified to safeguard confidentiality and independence of judgements during the process.

Thirteen potential experts were approached through the investigators' professional networks. The experts were first contacted via email in July 2018, along with objectives, study details and written informed consent forms. Online introduction to the Delphi survey procedures was then provided to the twelve experts who returned their signed informed consent. The introductory package included a narrated online presentation of the whole study process, an online video on interpretation of evidence profiles, and an overview of the EtD framework.

***Part 3: Round 1 Delphi survey data collection and data analysis***

The Round 1 Delphi survey package, which included a questionnaire on demographic and professional information, evidence profiles and EtD frameworks of evidence-based CM interventions prepared in Part 1, was then emailed to the participants. Each expert was invited to complete and return the questionnaire by email.

For each CM intervention, Round 1 median rating of recommendation was calculated alongside interquartile range (IQR) to demonstrate magnitude of disagreement among experts. Median and IQR are preferred as they are less influenced by outliers when compared to mean and standard deviation.36-37 Agreement on the recommendation was expressed in percentage (%). With reference to the agreement standard adopted in previous studies, the consensus cut-off level of this study was set at 75%.38 In other words, an intervention would reach positive consensus as a service recommendation if ≥ 75% of experts rated “suggest this option” or “recommend this option” on the 4-point Likert scale; while negative consensus would be attained when ≥ 75% rated “suggest not this option” or “recommend against this option”.38 Interventions achieving positive consensus in Round 1 were considered as service recommendations. For interventions without consensus, qualitative comments were summarized and presented for further evaluation in Round 2. Besides, assessment results on each EtD framework criterion were expressed in percentage (%), based on the proportion of experts making a specific rating.

***Part 4: Round 2 Delphi survey data collection and data analysis***

In Round 2, the same panel of experts were asked to reassess CM interventions which neither reached positive nor negative consensus in Round 1. Delphi survey package for this round included: i) experts’ own rating in Round 1; ii) median ratings with IQRs and percentage agreement; iii) anonymous qualitative comments; as well as iv) assessment results on each EtD framework criterion from all other experts. Data collection and analysis similar to Round 1 were then performed. A list of finalized, local experts endorsed CM clinical service recommendations was generated at the end of Round 2, including all interventions with positive consensus across both rounds.

**Results**

***Participants***

Twelve cancer palliative care experts agreed to take part in the two-round Delphi survey. The response rates of completing both rounds were 100.0%. The expert panel comprised physicians (n=4), CMPs (n=4) and nurses (n=4), with four of them belonging to more than one profession. One-third of the experts worked in public tax funded hospitals (33.3%) and one-fourth (25%) in private outpatient settings at the time of the study. Majority of experts (66.7%) had professional experience in cancer palliative care for 7 years or more, while 33.3% had been conducting relevant research for over 15 years. (Table 1).

***Service recommendations developed in Round 1 Delphi survey***

***Overall Rating Results***

Three out of seven evidence-based CM interventions reached positive consensus as service recommendations in Round 1. Median rating of these three recommendations ranged from 2.5 to 3.0 (IQR: 0.00 to 1.00) on a 4-point Likert scale while the percentage agreement ranged from 83.4% to 91.7% (Table 2). Among the recommendations, quality of evidence assessed by CHIMERAS on i) acupuncture for reducing fatigue among palliative cancer patients and ii) acupressure for reducing fatigue among palliative cancer patients were moderate; while the quality of evidence on iii) moxibustion for reducing nausea and vomiting among patients receiving chemotherapy was high.

***Rating results from the Evidence to Decision framework***

*Priority of the problem*

Over 70% of the experts on the panel agreed all three recommended CM clinical services were ‘a priority’ from their perspectives (Figure 2).

*Benefits and harms of the interventions*

More than 80% agreed that overall certainty of evidence among the three recommendations were moderate or high (Figure 2). However, over half of experts believed that there was ‘important’ or ‘possibly important’ uncertainty about how much cancer patients might value the main outcomes (Figure 2). More than 75% regarded desirable anticipated effects of the three recommendations were ‘probably large’ or ‘large’. Over 50% indicated that undesirable anticipated effects of the three recommendations, except on acupuncture for reducing fatigue, were ‘probably small’ or ‘small’ (Figures 2 and 3). More than 75% agreed that desirable effects were large or probably large relative to undesirable effects (Figure 3).

Some experts provided qualitative comments on benefits and harms of these three recommendations. For i) acupuncture, one physician believed that it brought less adverse effects than CHM, as the latter might induce herb-drug interactions. However, the physician also suggested that patients receiving chemotherapy were more vulnerable to infection and therefore they should avoid receiving acupuncture treatment. For ii) acupressure, one physician pointed out that there was a lack of clinical evidence supporting its use for fatigue. Nonetheless, one CMP and one nurse regarded acupressure as safe and non-invasive under careful administration. For iii) moxibustion, one CMP highlighted that it was a very affordable treatment. As recommended by one physician and one nurse, patients receiving chemotherapy should be monitored for possible burns induced by moxibustion, as this might cause subsequent infections (Table 3).

*Equity, Acceptability and Feasibility of the interventions*

More than 40% believed that the three recommendations would ‘increase’ or ‘probably increase’ health inequities (Figure 3). However, they provided no qualitative comments on how such inequities might arise, as well as the potential impact of such inequities.

Over 75% recognized that these recommendations were acceptable to key stakeholders, and were feasible to implement in the Hong Kong health system (Figures 3 to 4). To this end, some experts provided the following qualitative comments: i) two CMPs and one nurse claimed that acupuncture would be more acceptable by the public as compared to CHM, since the former would not cause harmful herb-drug interactions; ii) one CMP suggested that acupressure would be widely used in hospital and home setting because it was safe and non-invasive; and iii) one CMP recommended that appropriate ventilation of smoke particulates emitted during moxibustion would be required during service provision. When implementing these three recommendations, two CMPs, one physician and one nurse suggested that close monitoring of patients’ health conditions would be of high importance, given the vulnerability of palliative cancer patients (Table 3).

*Balance of Consequences*

More than 60% agreed that desirable consequences of the three recommendations probably or clearly outweighed undesirable consequences (Figure 4). Details of experts’ qualitative comments, including recommendations for future research, are shown in Table 3.

***Interventions without consensus after the two-round Delphi survey***

***Overall rating results***

In the Round 2 Delphi survey, evidence profiles and EtD frameworks of the remaining four interventions were reevaluated. None of these interventions reached positive or negative consensus. The median rating ranged from 2.00 to 3.00 (IQR: 1.00 to 1.75) while the percentage agreement ranged from 33.3% to 66.7% (Table 2).

Quality of evidence assessed by CHIMERAS regarding i) electroacupuncture plus antiemetics among palliative cancer patients for reducing nausea and vomiting and ii) hyperthermia plus *Gui-dan-san-zi-san* (桂丹三籽散) among patients receiving radiotherapy for reducing pain were moderate; while the quality of evidence on iii) *Zi-long-jing* (紫龍金) among patients receiving chemotherapy and iv) *Ganoderma lucidum* (靈芝) extract among patients receiving chemotherapy or radiotherapy for improving quality of life were high.

Panel experts expressed concerns on the safety of these four interventions. For i) electroacupuncture plus antiemetics, one physician suggested the avoidance of electroacupuncture among patients with pacemaker, artificial joints, and neuropathy. For ii) hyperthermia plus *Gui-dan-san-zi-san* and iii) *Zi-long-jing*, safety of applying hyperthermia among patients receiving radiotherapy, as well as potentially harmful herb-drug interactions between *Zi-long-jing* and chemotherapeutic agents, remained to be main concerns among experts from all disciplines. For iv) *Ganoderma lucidum* extract, one physician and one nurse expressed concerns on its negative impact on blood cell count, as well as possible negative herb-drug interactions between *Ganoderma lucidum* and chemotherapeutic agents. Detailed reporting of rating results on the EtD framework criteria and other qualitative comments are presented in Appendix 4 (Supplementary material).

**Discussion**

***Summary of findings***

Three out of seven evidence-based interventions reached positive consensus as service recommendations. These recommendations were i) acupuncture for reducing fatigue among palliative cancer patients; ii) acupressure for reducing fatigue among palliative cancer patients; and iii) moxibustion for reducing nausea and vomiting among patients receiving chemotherapy.

***Considering patients’ values in developing future service recommendations***

Although palliative care ideally should align strongly with patient-centered principles,39 our findings indicated that the experts reported substantial uncertainty about how much patients might value the main outcomes attributable to CM clinical services that failed to reach consensus. This finding was contradictory to the result of a representative survey showing high prevalence of CM service usage in Hong Kong, with 16.5% of the population consulting CMP at least once in a 12-month time-frame.40

According to a previous SR of qualitative and quantitative studies, some patients with chronic or serious diseases, including cancer, chose to use CM because of its perceived strength in i) providing tonic care; ii) individualizing treatment to address various health needs; iii) bringing few adverse effects; iv) guiding for health maintenance and health promotion; and v) improving health conditions which could not be cured completely by BM.41 However, CM was perceived to be less effective in managing serious diseases and slow in demonstrating treatment effect when compared to BM.41 As patients believed that the co-use of BM and CM would offset weakness of both systems of medicine while retaining their specific strengths, they intended to use BM and CM services simultaneously to address their complex needs in a holistic way.41 On the other hand, both physicians and CMPs agreed that patients should have the right to choose between BM and CM services in a focus group study.23 From the perspective of patient-centred care, our findings suggested that it would be important to address healthcare professionals' uncertainty about patients' value in CM clinical services in the future.

Since patients’ role in clinical decision making is becoming increasingly recognized,42 future development of evidence-based clinical service recommendations may consider adding patients to the expert panel.43 Besides, experts suggested using validated patient-reported outcomes (PROs) tools to monitor responses to CM treatments. This may help improving healthcare professionals' understanding on impact from CM service delivered,44 particularly in enhancing patients' quality of life and functional performance.

***Uncertainty on adverse events as a barrier to interprofessional collaboration***

Modalities for which consensus was reached in this study were acupuncture and related therapies, with the use of electroacupuncture being rejected by the experts. Despite evidence on the effectiveness of electroacupuncture for reducing nausea and vomiting,3 this intervention was rejected due to physicians’ perceived harm of performing electroacupuncture among patients with cardiac pacemaker45 and neuropathy.46 This may indicate an exaggeration of undesirable effects attributable to electroacupuncture47, since Delphi result concluded that the use of electroacupuncture should be rejected among all pallative care patients. Such potentially over-cautious view implies a need for disseminating evidence on safety of acupuncture treatments among conventionally trained healthcare professionals, rather than focusing dissemination solely on evidence of efficacy.

Potential interprofessional conflicts over malpractice liability may also be a root cause for deep concerns on CM-related adverse events among the experts. Existing literature suggested a number of strategies for reducing the uncertainty48 among physicians, CMPs and nurses: i) determine clinical risk level; ii) document evidence supporting the choice of BM and CM treatments in an appropriate manner; iii) elicit informed consent for patients before carrying out any integrative treatments; iv) closely monitor patients’ health conditions; and v) improve communications among different professions and arrange for interprofessional consultation if needed.48

However, these strategies for reducing uncertainty may not be applicable for the co-use of CHM and conventional medications in an interprofessional collaborative environment. In our study, concerns over potentially harmful herb-drug interactions49 were repeatedly expressed as a reason for rejecting CHM interventions, even though experts were unable to cite research supporting such concerns. Existing evidence suggested that pharmacokinetic interactions between CHM and chemotherapeutics50 might lead to unpredictable toxicities and even multi-organ failure.51 Building a strong evidence base on the safety of CHM, as well as herb-drug interactions using appropriate observational studies should be regarded as a research priority.

***Possible health inequities caused by implementing the recommendations***

In Hong Kong, fees for CM general consultation service in non-private sector are regulated by the government at a standardized and reasonable level, with provision of subsidies for patients who are in need. Private CM consultation fees are determined by the market without regulation.52 According to the 2019 Thematic Household Survey, a representative survey monitoring health service use among non-institutionalized Hong Kong population, only 0.5% of the interviewees utilized CM service delivered by non-private sector. Majority (16.0%) consulted CMPs in the private sector.40 Therefore, if the recommended services are implemented, most patients will access them via private CMPs, which would incur much more out-of-pocket expenses. This could be the reason why our experts expressed concerns on widening inequities on CM service access. Policies to reduce financial barriers are needed prior to implementing our current recommendations, for example through enhancing public-private partnership (PPP).26 PPP can facilitate the contractual relationship between a public agency and a private entity, thus promoting greater private-sector participation in the provision of evidence-based CM services for those who cannot afford.53

***Tailoring implementation strategies to inform future interprofessional collaboration***

While experts were generally positive on the recommendations’ implementability, there is a need to tailor practical strategies for promoting their actual implementation. The design of implementation strategies may follow a three-step approach described as follow. In Step 1, contextual barriers and facilitators of implementing the recommendations can be identified through conducting qualitative studies guided by the Consolidated Framework for Implementation Research (CFIR).54 In Step 2, assessment results from Step 1 can guide the generation of implementation strategies. These strategies should be tailored to address barriers, and to enhance facilitators of implementation. Implementation strategies catalogues developed by the Expert Recommendations for Implementing Change (ERIC) study55 offer a wide range of possible interventions. In Step 3, proposed implementation strategies identified in Step 2 should be finalized via establishing local expert consensus using Delphi techniques, so as to increase stakeholders’ acceptability.56

***Strengths and limitations***

A Delphi survey approach based on the GRADE-ADOLOPMENT framework was first applied for developing evidence-based CM clinical service recommendations for cancer palliative care. These evidence-based recommendations have been contextualized to address relationship between BM and CM, as well as features of the Hong Kong health system. The use of EtD framework offered structured recordings of judgements in the process of reaching recommendations among a multidisciplinary panel of experts. This inclusive approach would facilitate interprofessional understanding in the future implementation of these recommendations.

Since this study focused on CHM and acupuncture and related therapies identified from existing overviews of SRs and SRs,2-6 we have omitted other important interventions, such as Tai Chi57-58, Qigong57-58, Tuina58 and cupping59. Purposive sampling of experts via the investigators’ professional networks might induce researcher bias in the selection process.60 Nevertheless, we believe that the impact of researcher bias would be small, as service recommendations could not be made unless experts across all disciplines arrived at consensus. It is unlikely that researcher bias alone could foster consensus at a high cut-off level of 75% during the Delphi process. Lastly, our service recommendations were generated without involvement of patients and caregivers. Future Delphi studies should consider adding them to the expert panel, of which the process will empower them in co-producing evidence-based guidelines meaningfully.43

**Conclusion**

Three evidence-based CM interventions reached positive consensus as service recommendations for cancer palliative care among experts in this GRADE-ADOLOPMENT based two-round Delphi survey. To implement these three service recommendations in the Hong Kong health system where BM and CM are practiced in a parallel manner, further study is needed for tailoring implementation strategies which address needs of local context, with strong inputs from frontline clinicians across the two disciplines.

**Acknowledgements**

The following contributed to this work. Study concept and design: CHLW, IXYW and VCHC. Acquisition of data: CHLW and VCHC. Interpretation of data: CHLW, IXYW and VCHC. Figures 1–4 preparation: CHLW. Tables 1–3 preparation: CHLW and IXYW. Appendix 1–4 (Supplementary materials) preparation: CHLW. Drafting of the manuscript: CHLW. Critical revision of the manuscript for important intellectual content: IXYW, JA, AS, JW, JCYW, THL and VCHC. Administrative, technical, or material support: CHLW. All authors reviewed the manuscript, agreed to all the contents and agreed the submission.

**Declaration of Conflicting Interests**

The authors have declared no conflicts of interest.

**Funding**

This research was supported by the High-level Talents Introduction Plan from Central South University (No. 502045003).

**Ethics Approval**

Ethical approval was obtained from the Survey and Behavioural Research Ethics Committee, The Chinese University of Hong Kong (reference no.: 023-17).

**References:**

1. World Health Organization. *WHO traditional medicine strategy 2014-23*. World Health Organization. 2013.

2. Chung VC, Wu X, Lu P, et al. Chinese herbal medicine for symptom management in cancer palliative care: systematic review and meta-analysis. *Medicine (Baltimore)*. 2016;95(7).

3. Lau CH, Wu X, Chung VC, et al. Acupuncture and related therapies for symptom management in palliative cancer care: systematic review and meta-analysis. *Medicine (Baltimore)*. 2016;95(9).

4. Wu X, Chung VC, Lu P, et al. Chinese herbal medicine for improving quality of life among nonsmall cell lung cancer patients: overview of systematic reviews and network meta-analysis. *Medicine (Baltimore)*. 2016;95(1).

5. Chung VC, Wu X, Hui EP, et al. Effectiveness of Chinese herbal medicine for cancer palliative care: overview of systematic reviews with meta-analyses. *Sci Rep*. 2015;5:18111.

6. Wu X, Chung VC, Hui EP, et al. Effectiveness of acupuncture and related therapies for palliative care of cancer: overview of systematic reviews. *Sci Rep*. 2015;5:16776.

7. National Comprehensive Cancer Network. NCCN Clinical Practice Guidelines in Oncology: Palliative Care. Version 2. 2019. <https://www.nccn.org/professionals/physician_gls/pdf/palliative.pdf> (accessed 10 May 2019).

8. National Comprehensive Cancer Network. NCCN Clinical Practice Guidelines in Oncology: Adult Cancer Pain. Version 1. 2019. <https://www.nccn.org/professionals/physician_gls/pdf/pain.pdf>

(accessed 22 Feb 2019).

9. Sackett DL, Rosenberg WM, Gray JM, et al. Evidence based medicine: what it is and what it isn't. *BMJ*. 1996.

10. Neumann I, Brignardello-Petersen R, Wiercioch W, et al. The GRADE evidence-to-decision framework: a report of its testing and application in 15 international guideline panels. *Implement Sci*. 2015;11(1):93.

11. Schünemann HJ, Wiercioch W, Brozek J, et al. GRADE Evidence to Decision (EtD) frameworks for adoption, adaptation, and de novo development of trustworthy recommendations: GRADE-ADOLOPMENT. *J Clin Epidemiol*. 2017;81:101-10.

12. Alonso-Coello P, Oxman AD, Moberg J, et al. GRADE Evidence to Decision (EtD) frameworks: a systematic and transparent approach to making well informed healthcare choices. 2: Clinical practice guidelines. *BMJ*. 2016;353:i2089.

13. Moberg J, Oxman AD, Rosenbaum S, et al. The GRADE Evidence to Decision (EtD) framework for health system and public health decisions. *Health Res Policy Syst*. 2018;16(1):45.

14. Tremblay MS, Chaput J-P, Adamo KB, et al. Canadian 24-hour movement guidelines for the early years (0–4 years): an integration of physical activity, sedentary behaviour, and sleep. *BMC Public Health*. 2017;17(5):874.

15. Okely AD, Ghersi D, Hesketh KD, et al. A collaborative approach to adopting/adapting guidelines-The Australian 24-Hour Movement Guidelines for the early years (Birth to 5 years): an integration of physical activity, sedentary behavior, and sleep. *BMC Public Health*. 2017;17(5):869.

16. Schunemann H, Mustafa R, Brozek J, et al. Saudi Arabian Handbook for Healthcare Guideline Development Version 1.0. 2014. <https://www.moh.gov.sa/depten/TCP/Documents/Saudi%20Arabian%20Handbook%20for%20Healthcare%20Guideline%20Development-updated20-7.pdf> (accessed 9 Sept 2019).

17. Hong Kong Cancer Registry, Hospital Authority. Overview of Hong Kong Cancer Statistics of 2016. 2016. <http://www3.ha.org.hk/cancereg/pdf/overview/Summary%20of%20CanStat%202016.pdf>. (accessed 12 Feb 2019).

18. Lee V, Lam T, Jing H, et al. Integrative palliative cancer care in Hong Kong: an overview and an example from the East. *Clin Oncol (R Coll Radiol)*. 2019;31(8):589-594.

19. Lam Y-c, Cheng C-w, Peng H, et al. Cancer patients' attitudes towards Chinese medicine: a Hong Kong survey. *Chin Med*. 2009;4(1):25.

20. Chiu SW, Ko LS, Lee RP. Decolonization and the movement for institutionalization of Chinese medicine in Hong Kong: a political process perspective. *Soc Sci Med*. 2005;61(5):1045-1058.

21. Chung VC, Hillier S, Lau CH, et al. Referral to and attitude towards traditional Chinese medicine amongst western medical doctors in postcolonial Hong Kong. *Soc Sci Med.* 2011;72(2):247-255.

22. Tzeng YL. A study on the nursing staff’s knowledge, attitude and behaviour and their related factors toward Chinese medicine [in Chinese]. *Journal of Nursing (China).*1999;46:57-70.

23. Chung VC, Ma PH, Lau CH, et al. Developing policy for integrating biomedicine and traditional chinese medical practice using focus groups and the delphi technique. *Evid Based Complement Alternat Med*. 2012;2012:149512.

24. Lam TP, Sun KS. Dilemma of integration with Western medicine–Views of Traditional Chinese Medicine practitioners in a predominant Western medical setting. *Complement Ther Med*. 2013;21(4):300-305.

25. Chung VC, Ma PH, Hong LC, et al. Organizational determinants of interprofessional collaboration in integrative health care: systematic review of qualitative studies. *PLoS One*. 2012;7(11):e50022.

26. Park YL, Canaway R. Integrating Traditional and Complementary Medicine with National Healthcare Systems for Universal Health Coverage in Asia and the Western Pacific. *Health Syst Reform*. 2019;5:24-31.

27. Jünger S, Payne SA, Brine J, et al. Guidance on Conducting and REporting DElphi Studies (CREDES) in palliative care: recommendations based on a methodological systematic review. *Palliat Med*. 2017;31(8):684-706.

28. Shea BJ, Grimshaw JM, Wells GA, et al. Development of AMSTAR: a measurement tool to assess the methodological quality of systematic reviews. *BMC Med Res Methodol*. 2007;7:10.

29. Higgins JPT, Altman DG, Gotzsche PC, et al. The Cochrane Collaboration's tool for assessing risk of bias in randomised trials. *BMJ*. 2011;343:d5928.

30. Guyatt GH, Oxman AD, Santesso N, et al. GRADE guidelines: 12. Preparing summary of findings tables—binary outcomes. *J Clin Epidemiol*. 2013;66(2):158-72.

31. Guyatt GH, Thorlund K, Oxman AD, et al. GRADE guidelines: 13. Preparing summary of findings tables and evidence profiles—continuous outcomes. *J Clin Epidemiol*. 2013;66(2):173-83.

32. Wu XY, Chung VC, Wong CH, et al. CHIMERAS showed better inter-rater reliability and inter-consensus reliability than GRADE in grading quality of evidence: A randomized controlled trial. *Eur J Integr Med*. 2018;23:116-22.

33. Alonso-Coello P, Schünemann HJ, Moberg J, et al. GRADE Evidence to Decision (EtD) frameworks: a systematic and transparent approach to making well informed healthcare choices. 1: Introduction. *BMJ*. 2016;353:i2016.

34. Andrews J, Guyatt G, Oxman AD, et al. GRADE guidelines: 14. Going from evidence to recommendations: the significance and presentation of recommendations. *J Clin Epidemiol*. 2013;66(7):719-725.

35. Palinkas LA, Horwitz SM, Green CA, et al. Purposeful Sampling for Qualitative Data Collection and Analysis in Mixed Method Implementation Research. *Adm Policy Ment Health*. 2015;42(5):533–544.

36. Murphy M. Consensus development methods, and their use in clinical guideline development. *Health Technol Assess*. 1998;2(3):1-88.

37. Kim T-H, White H. On more robust estimation of skewness and kurtosis. *Finance Research Letters*. 2004;1(1):56-73.

38. Diamond IR, Grant RC, Feldman BM, et al. Defining consensus: a systematic review recommends methodologic criteria for reporting of Delphi studies. *J Clin Epidemiol*. 2014;67(4):401-9.

39. World Health Organization. *WHO Definition of Palliative Care.* 2019. <https://www.who.int/cancer/palliative/definition/en/> (accessed 28 Apr 2019).

40. Census and Statistics Department, The Government of Hong Kong Special Administrative Region. Thematic Househould Survey No.68. 2019. <https://www.statistics.gov.hk/pub/B11302682019XXXXB0100.pdf> (accessed 29 Jan 2020).

41. Chung VC, Ma PH, Lau CH, et al. Views on traditional Chinese medicine amongst C hinese population: a systematic review of qualitative and quantitative studies. *Health Expect* 2014;17(5):622-636.

42. Elwyn G, Frosch D, Thomson R, et al. Shared decision making: a model for clinical practice. *J Gen Intern Med*. 2012;27(10):1361-1367.

43. Armstrong MJ, Mullins CD, Gronseth GS, et al. Impact of patient involvement on clinical practice guideline development: a parallel group study. *Implement Sci*. 2018;13(1):55.

44. Weldring T, Smith SM. Article Commentary: Patient-Reported Outcomes (PROs) and Patient-Reported Outcome Measures (PROMs). *Health Serv Insights*. 2013;6:61-68.

45. Lau EW, Birnie DH, Lemery R, et al. Acupuncture triggering inappropriate ICD shocks. *Europace*. 2005;7(1):85-6.

46. White A. A cumulative review of the range and incidence of significant adverse events associated with acupuncture. *Acupunct Med*. 2004;22(3):122-33.

47. Chan MW, Wu XY, Wu JC, et al. Safety of acupuncture: overview of systematic reviews. *Sci Rep*. 2017;7(1):3369.

48. Cohen MH, Eisenberg DM. Potential physician malpractice liability associated with complementary and integrative medical therapies. *Ann Intern Med*. 2002;136(8):596-603.

49. Posadzki P, Watson L, Ernst E. Herb–drug interactions: an overview of systematic reviews. *Br J Clin Pharmacol*. 2013;75 (3):603-618.

50. Cheng CW, Fan W, Ko SG, et al. Evidence-based management of herb-drug interaction in cancer chemotherapy. *Explore (NY)*. 2010;6(5):324-329.

51. Chiu J, Yau T, Epstein RJ. Complications of traditional Chinese/herbal medicines (TCM)—a guide for perplexed oncologists and other cancer caregivers. *Support Care Cancer*. 2009;17(3):231-240

52. The Government of Hong Kong Special Administrative Region. Press Releases. LCQ3: Development of Chinese Medicine services. 2017. <https://www.info.gov.hk/gia/general/201712/06/P2017120600618.htm> (Accessed 17 Apr 2019).

53. The Government of Hong Kong Special Administrative Region. Serving the Community By Using the Private Sector Policy and Practice. 2007. <https://www.effo.gov.hk/en/reference/publications/PolicyPractice2007.pdf> (accessed 9 Sept 2019).

54. Damschroder LJ, Aron DC, Keith RE, et al. Fostering implementation of health services research findings into practice: a consolidated framework for advancing implementation science. *Implement Sci*. 2009;4(1):50.

55. Powell BJ, Waltz TJ, Chinman MJ, et al. A refined compilation of implementation strategies: results from the Expert Recommendations for Implementing Change (ERIC) project. *Implement Sci*. 2015;10(1):21.

56. Holey EA, Feeley JL, Dixon J, et al. An exploration of the use of simple statistics to measure consensus and stability in Delphi studies. *BMC Med Res Methodol*. 2007;7(1):52.

57. Zeng Y, Xie X, Cheng AS. Qigong or Tai Chi in Cancer Care: an Updated Systematic Review and Meta-analysis. *Curr Oncol Rep*. 2019;21(6):48.

58. Tao WW, Jiang H, Tao XM, et al. Effects of acupuncture, tuina, tai chi, Qigong, and traditional Chinese medicine five-element music therapy on symptom management and quality of life for cancer patients: a meta-analysis. *J Pain Symptom Manage*. 2016; 51:728-747.

59. Cao H, Li X, Liu J. An updated review of the efficacy of cupping therapy. *PLoS One*. 2012;7(2):e31793.

60. Sharma, G. Pros and cons of different sampling techniques. *International journal of applied research*. 2017;3(7):749-752.
